# Linking Free Text Documentation of Functioning and Disability to the ICF with Natural Language Processing

Denis Newman-Griffis<sup>1,2\*</sup>, Jonathan Camacho Maldonado<sup>1</sup>, Pei-Shu Ho<sup>1</sup>, Maryanne Sacco<sup>1</sup>, Rafael Jimenez Silva<sup>1</sup>, Julia Porcino<sup>1</sup>, Leighton Chan<sup>1</sup>

<sup>1</sup>Epidemiology & Biostatistics Section, Rehabilitation Medicine Department, National Institutes of Health Clinical Center, Bethesda, MD, United States

<sup>2</sup>Department of Biomedical Informatics, University of Pittsburgh, Pittsburgh, PA, United States

**\* Correspondence:**

Denis Newman-Griffis

[denis.newman-griffis@nih.gov](mailto:denis.newman-griffis@nih.gov)

**Keywords:** Natural language processing; clinical coding; disability evaluation; International Classification of Functioning, Disability and Health; Electronic Health Records; artificial intelligence; functioning

## Abstract

**Background:** Invaluable information on patient functioning and the complex interactions that define it is recorded in free text portions of the Electronic Health Record (EHR). Leveraging this information to improve clinical decision-making and conduct research requires natural language processing (NLP) technologies to identify and organize the information recorded in clinical documentation.

**Methods:** We used NLP methods to analyze information about patient functioning recorded in two collections of clinical documents pertaining to claims for federal disability benefits from the U.S. Social Security Administration (SSA). We grounded our analysis in the International Classification of Functioning, Disability and Health (ICF), and used the ICF's Activities and Participation domain to classify information about functioning in three key areas: Mobility, Self-Care, and Domestic Life. After annotating functional status information in our datasets through expert clinical review, we trained machine learning-based NLP models to automatically assign ICF codes to mentions of functional activity.

**Results:** We found that rich and diverse information on patient functioning was documented in the free text records. Annotation of 289 documents for Mobility information yielded 2,455 mentions of Mobility activities and 3,176 specific actions corresponding to 13 ICF-based codes. Annotation of 329 documents for Self-Care and Domestic Life information yielded 3,990 activity mentions and 4,665 specific actions corresponding to 16 ICF-based codes. NLP systems for automated ICF coding achieved over 80% macro-averaged F-measure on both datasets, indicating strong performance across all ICF codes used.

**Conclusions:** NLP can help to navigate the tradeoff between flexible and expressive clinical documentation of functioning and standardizable data for comparability and learning. The ICF has practical limitations for classifying functional status information in clinical documentation, but presents a valuable framework for organizing the information recorded in health records about patient

functioning. This study advances the development of robust, ICF-based NLP technologies to analyze information on patient functioning, and has significant implications for NLP-powered analysis of functional status information in disability benefits management, clinical care, and research.

## 1 Introduction

Understanding a person's functioning requires a multifaceted picture of the complex interactions between the person and the world around them. The International Classification of Functioning, Disability and Health (ICF) (1) conceptualizes these interactions as between a person's health condition(s), body structures and functions, activities and participation, and both environmental and personal contextual factors. In order to fully capture the multifactorial nature of functional outcomes and a person's experience of their functioning, providers primarily turn to free text documentation in the Electronic Health Record (EHR) (2–4). While the flexibility of free text presents a barrier to standardization in the EHR, limiting comparability across patients and opportunities for data-driven learning in modern health systems (5), the expressivity of natural language is key to capturing the nuances of functioning as it is experienced in the patient's life (6). For example, two patients reporting moderate limitations in walking may experience them in entirely different ways: one may describe arthritic stiffness in their knees that causes manageable discomfort in navigating employment in an office, while another patient's chronic low back pain makes their hiking hobby no longer viable. These differences in experience, which inform both therapeutic interventions and the patient's perception of their own functioning, are difficult to capture in standardized instruments but can be easily described in natural language.

How to navigate the tradeoff between flexibility in clinical documentation and standardization for comparability and learning? We explore the use of natural language processing (NLP) systems, grounded in the ICF, to index and organize information about functioning and disability in free text clinical records, enabling a measure of standardization without sacrificing the details of patient experience. NLP can be used to identify, organize, and retrieve information from free text documents for use in clinical decision making and research (7,8). NLP shows growing promise for capturing and analyzing information on functioning: Kukafka et al. (9) developed an early system for coding rehabilitation discharge summaries to identify activities including eating, dressing, and toileting, and NLP has since been used for a variety of purposes including locating functional status documentation in oncology notes (10), identifying potential wheelchair use (11), and detecting functional outcomes of geriatric syndrome (12). We have previously developed NLP methods to identify activity mentions describing mobility functioning in clinical notes (13–15), and to link these activity mentions to the Mobility chapter of the ICF's Activities and Participation domain (16).

This study investigated NLP methods for automatically coding documentation of key domains of functioning to the ICF, and evaluated their performance on coding medical records associated with claims for federal disability benefits submitted to the U.S. Social Security Administration (SSA). We adapted our previous work on Mobility information to expand to information from the Self-Care and Domestic Life chapters of the ICF's Activities and Participation domain. Together with Mobility, these domains align with the majority of Activities of Daily Living (ADLs) (17,18), and account for 11 of the 18 items in the Functional Independence Measure (FIM) (19). Thus, NLP methods to automatically identify activities in these three ICF chapters have significant potential for use in clinical information systems.

The remainder of this article is organized as follows. In the Materials and Methods section, we describe the medical records we analyzed from SSA disability benefits claims and present the NLP

methods used for ICF coding. The Results section presents our experimental findings and an analysis of successes and challenges in coding clinical data with the ICF. The Discussion section outlines implications from our work, including challenges for applying the ICF in coding clinical notes, opportunities for NLP impact in the SSA disability adjudication process and in broader clinical information systems, and limitations of the study.

## **2 Materials and Methods**

### **2.1 Data sources and use of the ICF**

Our primary data source for this study was free text medical records collected by SSA in the process of adjudicating federal disability benefits claims. During the adjudication process of an individual's claim, SSA may obtain records from that individual's prior medical encounters in order to collect medical evidence related to the disability claim. These records are reviewed by expert adjudicators at SSA to identify appropriate evidence to support the claim decision, such as impairment history and severity, relationship to work requirements, etc. The volume of these records is substantial, with each claim having potentially hundreds or thousands of pages of associated medical records, presenting a significant opportunity for NLP methods to assist in evidence review by automatically identifying relevant information.

We used two types of medical documents in the study. (1) Consultative Examination (CE) reports are written by a medical expert commissioned by SSA to examine a claimant in-depth as part of the claim adjudication process. (2) EHR data are provided directly to SSA by health providers pursuant to a disability benefits claim. Both types of documents are frequently submitted to SSA as faxed or scanned documents, and thus require Optical Character Recognition (OCR) to convert them to text for NLP analysis. All documents used in this study were converted to text using the Nuance OmniPage™ (now Kofax OmniPage Ultimate™) OCR software.

We selected the ICF, and the Activities and Participation domain in particular, as our framework for identifying functioning information in these documents. We chose the ICF due to its role as an internationally recognized coding system for functioning, and our familiarity with it (6,15,16). SSA assesses function as part of the claim adjudication process, including assessment of residual functional capacity for individuals applying for disability benefits, examining both physical and mental function. We identified the Mobility, Self-Care, and Domestic Life chapters of the ICF as being most relevant to this process and the types of functioning documented most frequently in the data we reviewed. As noted in the Introduction, these chapters are also closely aligned with commonly used ADL measures and the FIM, making them particularly relevant types of information to study for a broad range of information needs in rehabilitation. We use title case in this article to refer to Mobility, Self-Care, and Domestic Life information, as defined by the ICF, to distinguish from the more general uses of these terms.

#### **2.1.1 Document collections for annotation**

We identified two sets of medical documents from SSA to annotate for functional status information (FSI; i.e., information about patient functioning, including specific observations in activity mentions). Both datasets for annotation were drawn from adult disability benefits claims with a decision issued in 2016-2018, primarily related to musculoskeletal, neurological, or mental impairments.

Following our prior work on analyzing Mobility information (15), we identified 300 CEs likely to contain descriptions of Mobility functioning. We ensured that each CE corresponded to a different claimant in order to control for cross-document correlation from an individual claimant.

An additional 350 documents were then selected to annotate for Self-Care and Domestic Life information. The documents were selected from the same overall set of claims as the Mobility documents, but we ensured that the specific claims used in annotation were disjoint between the two datasets. As the concepts of Self-Care and Domestic Life are highly intertwined and often discussed together in clinical notes—e.g., eating (Self-Care) and preparing meals and cleaning (Domestic Life)—we chose to annotate for these chapters jointly (referred to in the remainder of the article as “Self-Care/Domestic Life”). Annotated documents included both CEs and EHR data; no two documents of the same type were included for any individual claimant.

### 2.1.2 SSA document collection for language modeling

A further set of 65,514 documents collected by SSA were used for training NLP models of clinical language in the SSA setting (as detailed in the “Text representation with language modeling” section below). Many documents included in this collection included notes from multiple clinical encounters during a patient’s history with a particular healthcare provider. Each “document” was thus much longer on average than a single clinical note, with a median document length of 3,476 words. These documents were sampled by SSA separately from the documents used for annotation, using a broader set of criteria to enhance diversity of the data: adult claims adjudicated based on musculoskeletal, neurological, or mental impairments, with a decision issued during 2013-2018, drawn from multiple states around the U.S. We confirmed that no documents selected for Mobility or Self-Care/Domestic Life annotations were included in this collection.

## 2.2 Annotation process

Annotation of SSA documents for FSI regarding Mobility and Self-Care/Domestic Life was performed in a multi-stage process, illustrated in Figure 1. Mobility information was annotated using guidelines developed in previous work (15); we adapted this existing process to develop new guidelines for Self-Care/Domestic Life information. We developed the annotation guidelines via an iterative process among the annotators (JCM, PSH, MS, RJS), involving team annotation and discussion to refine a schema for representing Self-Care/Domestic Life information and develop clear guidelines for how to annotate for it in free text. After guideline development, the annotators jointly annotated a small set of documents (50 for the new Self-Care/Domestic Life guidelines, and 16 to

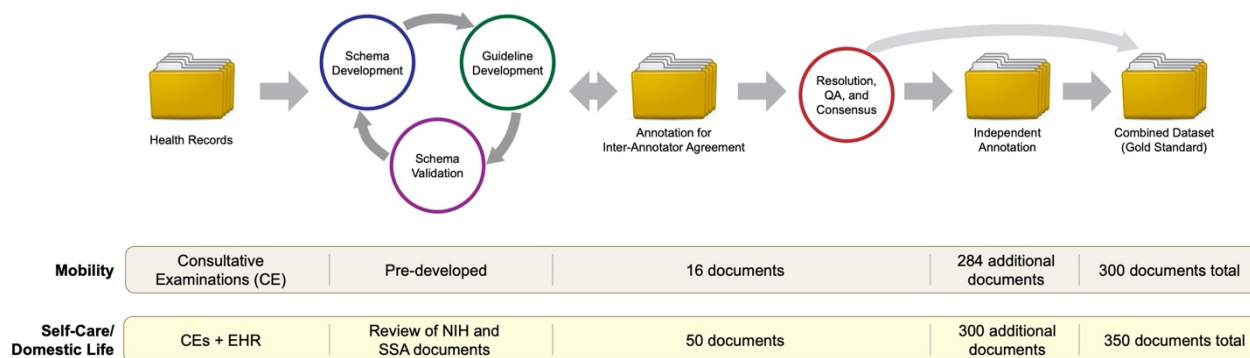

**Figure 1.** Flowchart illustration of annotation process. Data sources and document counts are provided for Mobility and Self-Care/Domestic Life annotations separately.

further validate the existing Mobility guidelines in SSA data), and Inter-Annotator Agreement (IAA) was calculated (IAA values are reported with other dataset statistics in the Results section). Following standard practice in annotating for text spans (20,21), we calculated IAA using the F-1 measure. Disagreements were then resolved by joint meetings among the annotators to produce a final consensus version of the jointly-annotated documents. Finally, each individual annotator annotated a further set of documents independently, which were then combined with the consensus annotations to produce the final “gold standard” annotated corpus.

When annotating a document, the first step in our process was to identify *activity mentions*, which we operationalized as self-contained spans of text describing a person’s functioning within the scope of the relevant ICF Activities and Participation chapters. Within each activity mention, we then identified each distinct *action* referred to, operationalized as a distinct activity defined by one of the three-digit ICF codes within the relevant chapters (or an activity of similar granularity not specifically captured in the ICF, e.g., “do household chores”). Each of these action components (which we denote with a capitalized *Action* for the remainder of this article, for clarity) was then assigned the three-digit ICF code best representing the activity described. We excluded the “other specified” and “unspecified” ICF codes, such as d598 *Self-care, other specified* and d599 *Self-care, other unspecified*, from use in annotation due to their ambiguity. In cases where an Action component referred to an activity for which no specific ICF code was appropriate (e.g., “doing household tasks”), or when multiple codes could apply (e.g., “denies difficulty with ADLs”), a label of “Other” was used. Figure 2 provides an illustrated example of Self-Care/Domestic Life activity mentions, including one with two Action components.

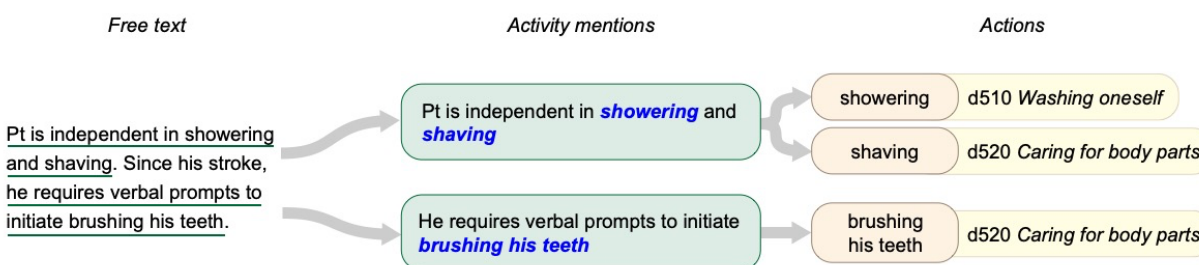

**Figure 2.** Structure of annotations for functional status information. Free text is annotated to identify activity mentions describing specific observations. Each activity mention may include one or more Action components, which can be mapped to three-digit ICF codes.

The focus of annotation was on observations or descriptions of specific, volitional activities performed by the patient within the specific domains of interest. We therefore excluded the following types of information about functioning: (1) hypothetical statements (e.g., “her sleep is better if she takes medication”); (2) education given by the provider (e.g., “Patient educated on how he can attempt to dress his lower body in bed”); and (3) references to habitual activity in the context of work duties (e.g., “his job at the hotel involves doing laundry and cleaning guest rooms”).

### 2.2.1 Coding for medication management and non-pharmacological therapies

Medication management and therapeutic interventions were frequently discussed as specific topics in documents reviewed for Self-Care/Domestic Life guideline development, but were not reflected by ICF codes more specific than d570 *Looking after one’s health*. To more accurately capture these frequent topics, we added two additional Action labels based on codes in the Systematized

Nomenclature of Medicine Clinical Terms set (SNOMED CT). We used *Manage medication* (SNOMED CT code 285033005) to refer to anything related to compliance with medications such as the ability to store medications, obtain medications, taking the medications, etc. It also included the mismanagement of medication (e.g., forgetting to take prescribed medications). We used *Therapy* (SNOMED CT code 709007004) to refer to non-pharmacological therapies such as addiction treatment programs, physical therapy, occupational therapy, cognitive behavioral therapy, psychological therapy, and anger management.

### 2.3 Methods for automated ICF coding

We experimented with two strategies to automatically assign ICF codes to Mobility and Self-Care/Domestic Life activity mentions. In our prior work (16), we explored a variety of methods for ICF coding, including both *classification*—identifying the group of samples a given activity mention is most similar to—and *candidate selection*—identifying which ICF code a given activity mention is most similar to—approaches, for Mobility information only. In this study, we evaluated the best-performing classification and candidate selection models from this prior work on the SSA datasets we developed for Mobility and Self-Care/Domestic Life. Our overall process is illustrated in Figure 3.

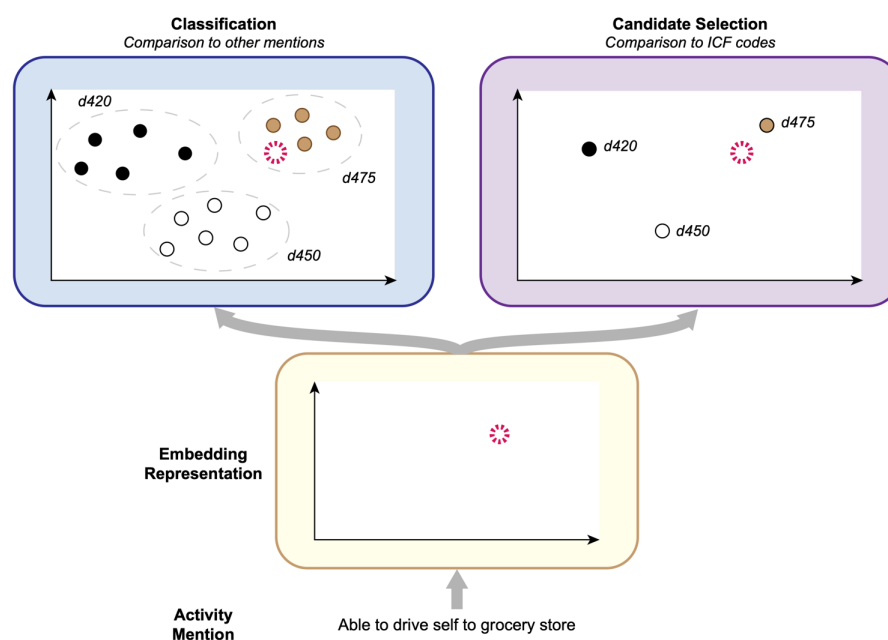

**Figure 3.** Conceptual illustration of ICF coding process. Given an activity mention, an embedding representation of the report is calculated, and then compared to (a) other activity mentions, in Classification; or (b) available ICF codes, in Candidate Selection.

#### 2.3.1 Text representation with word embeddings

Given an activity mention, we calculated a numeric representation of the text using word embedding features. Word embeddings represent words and phrases using real-valued vectors, such that similar words have similar vectors (22), and are fundamental resources for modern NLP methods. Our prior work demonstrated that word embedding features alone were more informative for ICF coding than

lexical features or combined embedding and lexical features (16); we therefore used word embedding features alone in this study. We experimented with two methods for word embedding:

- In *static* embeddings, each unique word is represented by a single vector. We used FastText (23), a commonly used method that integrates sub-word information into embedding learning to better capture morphological patterns.
- In *contextualized* embeddings, each word is represented by a single vector conditioned on the context it appears in; the vectors for “cold” in “patient described cold symptoms” and “applied a cold pack” are therefore different. We used BERT (24), a recent embedding model that has rapidly become the *de facto* standard for text representation in NLP.

Both static and contextualized embedding models are pre-trained based on a large observational corpus of text. As the choice of training corpus affects the semantic information represented in the embedding model—and therefore affects downstream utility in NLP tasks—we experimented with multiple training corpora, each of which reflects different tradeoffs between corpus size and representativeness for the target task. These corpora are summarized in Table 1.

**Table 1.** Free text corpora used to train word embedding models for text representation. MIMIC-III was used to train both FastText and BERT models; NIHCC and SSA were used for FastText embeddings only.

| Training corpus | Number of notes | Number of words (approx.) | Data description                                                                                                             |
|-----------------|-----------------|---------------------------|------------------------------------------------------------------------------------------------------------------------------|
| MIMIC           | 2,083,180       | 497 million               | Critical care admissions (25). Most commonly used corpus for language modeling in clinical NLP.                              |
| NIHCC           | 63,605          | 11.8 million              | Physical therapy and occupational therapy encounters, used in our prior work on coding Mobility information to the ICF (16). |
| SSA             | 65,514          | 664 million               | Clinical data associated with disability benefits claims submitted to SSA. New in this study.                                |

For static embeddings, we experimented with three clinical corpora for training word embedding features. In each case, document texts were tokenized with spaCy (26), and the following preprocessing was applied to remove variation irrelevant for language modeling: all words were converted to lowercase, all numbers were normalized to “[NUMBER]”, all URLs were normalized to “[URL]”, and all dates and times were normalized to “[DATE]” and “[TIME]” respectively. The FastText software (version 0.2.0) was used with the skipgram algorithm, 300-dimensional embeddings, and all other settings at default to train embeddings on the following three corpora:

- **MIMIC:** Approximately 2 million free text notes included in the MIMIC-III critical care database (25). Notes are associated with admissions to ICU units of three academic hospitals in Boston between 2001-2012, and are commonly used for language modeling in clinical NLP research.
- **NIHCC:** Over 63,000 free text notes from 10 years of Physical Therapy and Occupational Therapy encounters in the Rehabilitation Medicine Department of the NIH Clinical Center, collected and used for calculating word embedding features in our previous work (16).
- **SSA:** Over 65,000 free text notes associated with disability claims processed by SSA within a five-year period (as described in the “SSA document collection for language modeling” section above).

Contextualized embedding models require significant computing power to train on new data, and pre-trained models are typically used to generate text features. We used the clinicalBERT model released by Alsentzer et al. (27), which was trained on MIMIC clinical notes, and produces 768-dimensional word embeddings.

### 2.3.1.1 Action oracle

As illustrated in Figure 2, activity mentions are complex statements including multiple pieces of information. Thieu et al (15) define sub-components including (1) a source of Assistance—typically a device, person, or structure in the physical environment used in activity performance; (2) a Quantification—an objective measure of functional performance, such as distance or time; and (3) one or more specific Actions being performed, which correspond to defined activities in the ICF Activities and Participation domain. Action components are annotated with the 3-digit ICF codes which the NLP systems described in this study are designed to assign.

Prior work on extracting activity mentions from free text (13,14) did not include extraction of the Action sub-components. However, as NLP methods for functional status information continue to develop, more complex models that reflect the semantic structure of activity mentions will be needed. We therefore evaluated the ICF coding models in this study in two settings: (1) an *Action oracle* setting, in which both an activity mention and the location of an Action component within it are input to the ICF coding model; and (2) a non-oracle setting in which only the activity mention is provided (reflecting the technologies so far developed for extracting activity mentions).

### 2.3.2 Classification

In classification approaches, a mathematical representation is calculated for each activity mention, and a model is trained to assign an ICF code to each Action component based on its similarity to previously-observed samples labeled with each ICF code. We adopted the best-performing classification model from our prior work (16), of a Support Vector Machine (28) using word embedding features as input. Given an input activity mention, we calculated its embedding features in one of four ways:

- **Static embeddings, no Action oracle:** the activity mention is represented as the averaged embedding for each of its words.
- **Static embeddings, with Action oracle:** two averaged embeddings are calculated: (1) the averaged embedding for the words in the Action component; and (2) the average of other all words in the activity mention. These are concatenated to produce the final representation.
- **Contextualized embeddings, no Action oracle:** the activity mention is represented as the averaged context-sensitive embeddings for each of its words.
- **Contextualized embeddings, with Action oracle:** as the contextualized embeddings of words in the Action component already reflect information about the full activity mention, we averaged the embeddings of Action component words only.

### 2.3.3 Candidate selection

In the candidate selection approach, an embedding representation is calculated for each activity mention, and is then compared to embedding representations of each of the available ICF codes to identify which code the given mention is most similar to. We adopted the best-performing candidate selection model from our prior work (16), consisting of a Deep Neural Network (DNN) that operates as follows:



- (1) The model takes as input an activity mention embedding and embedding representations of the ICF codes that could be assigned to it (i.e., all Mobility codes or all Self-Care/Domestic Life codes).
- (2) These embeddings are all fed into a DNN to calculate new embedding representations of the candidate ICF codes, conditioned on this specific activity mention.
- (3) The conditional ICF code embeddings are compared to the activity mention embedding using cosine similarity, and the most similar code is chosen as the model output.

Embedding features of activity mentions were calculated using the strategies described in the “Classification” section. Embedding representations of ICF codes were calculated as the averaged embeddings of each word in the definition of the code presented in the ICF, using both static and contextualized embeddings. For the “Other” label, the following definitions were used: “Mobility other or unspecified” for Mobility, and “Self care or domestic life other or unspecified” for Self-Care/Domestic Life. For the added *Therapy* and *Manage medication* labels, we used the names of the corresponding SNOMED CT codes (“Ability to manage medication” and “Compliance behavior to therapeutic regimen”, respectively). Further details of the model are presented in (16). Following our prior work, we used a 3-layer DNN with hidden layer size 300 when using static embedding features without the Action oracle, a 3-layer DNN with layer size 600 when using static embeddings with the Action oracle (to match the dimensionality of the concatenated activity mention and Action component embeddings), and a 1-layer DNN with layer size 768 when using BERT embedding features (for which vector dimensionality does not change with the Action oracle).

## 2.4 Experimental procedure

Each dataset was split at the document level into training data, for training the machine learning models, and test data for evaluating them. Test documents were sampled to include at least 20% of the samples for each ICF code. Statistical significance testing was performed using the bootstrap resampling method with 1000 replicates, which is commonly used to analyze performance metrics in NLP research (29,30).

### 2.4.1 Development experiments

Training data was further split into ten folds for development experiments to select the best word embedding method for classification and candidate selection approaches. For development experiments, cross validation was used: models were trained on nine folds (90% of the training data) and evaluated on the held-out tenth fold, and this process was then repeated to evaluate on each of the ten folds, with model performance being averaged across the folds to calculate final values. Model performance was calculated using F-1 score (20), calculated as the harmonic mean between precision (positive predictive value) and recall (sensitivity). F-1 score was calculated for each ICF code in each dataset, and averaged across codes to calculate macro F-1. The embeddings producing highest macro F-1 on the development experiments were chosen to use for the main experiments.

### 2.4.2 Main experiments and model evaluation

Once final word embeddings were chosen, an additional classification and candidate selection model was trained for each of the Mobility and Self-Care/Domestic Life datasets, using all of the training data. These models were then evaluated on the held-out test documents, with performance measured using F-1 for each individual ICF code, and overall performance calculated as macro-averaged F-1 score.

### 3 Results

#### 3.1 Annotated datasets

Table 2 presents overall statistics of the two SSA datasets annotated for functional status information. Several of the documents selected for annotation were omitted after conversion to text with the OCR software due to failures in the OCR conversion, resulting in a total of 289 documents annotated for Mobility, and 329 documents annotated for Self-Care/Domestic Life. The majority of documents were found to contain descriptions of the target types of functioning: 251/289 (87%) of Mobility documents and 285/329 (87%) of Self-Care/Domestic Life documents contained at least one activity mention pertaining to the relevant ICF chapters. Each activity mention could contain zero, one, or more than one Action component; a total of 3,176 Actions were annotated for Mobility and 4,665 for Self-Care/Domestic Life. Only 132 Mobility activity mentions (5.4% of the total) and 134 Self-Care/Domestic Life activity mentions (3.4% of the total) were found to not contain any specific Action components. Inter-annotator agreement (IAA) was found to be 0.778 F-1 for Mobility and 0.695 F-1 for Self-Care/Domestic Life, comparable to IAA calculated in our previous study on annotating Mobility information in clinical reports (15). ICF coding has previously been found to be high agreement for resources and goals as well as specific problems (31). The two datasets are described in greater detail in the following sections.

**Table 2.** Datasets of documents annotated for functional status information, drawn from U.S. Social Security Administration disability benefits cases. Separate sets of documents were annotated for Mobility (ICF Activities and Participation Chapter 4) and Self-Care/Domestic Life (ICF Activities and Participation Chapters 5 and 6).

|                                         | Mobility      | Self-Care/Domestic Life |
|-----------------------------------------|---------------|-------------------------|
| Number of documents annotated           | 289           | 329                     |
| With activity mentions                  | 251           | 285                     |
| Total activity mentions                 | 2,455         | 3,990                   |
| Including at least one Action           | 2,323 (94.6%) | 3,866 (96.9%)           |
| Total number of Actions                 | 3,176         | 4,665                   |
| Training set size (documents / Actions) | 203 / 2,361   | 229 / 3,350             |
| Test set size (documents / Actions)     | 45 / 815      | 56 / 1,315              |

##### 3.1.1 Mobility dataset

A total of twelve unique three-digit ICF codes were used for annotating Mobility information; Table 3 lists the frequency of each of these codes in the annotated dataset, together with the “Other” category. Of the codes in the Mobility chapter, only d465 *Moving around using equipment* and d480 *Riding animals for transportation* were not used in the annotation process. The most frequent codes were d450 *Walking* (23.0% of Actions), d410 *Changing basic body position* (17.6% of Actions), and d415 *Maintaining a body position* (16.0% of Actions). Only d420 *Transferring oneself*, d435 *Moving objects with lower extremities*, and d460 *Moving around in different locations* were observed fewer than 100 times. A total of 123 samples (3.9% of Actions) were found that could not be mapped to a single appropriate three-digit code.

**Table 3.** ICF code descriptions and frequencies for Mobility dataset (3,176 samples total). Codes are ordered by frequency in the dataset. Descriptions given are the preferred name of each code in the ICF.

| Mobility Code | Description                                                                    | Frequency | Percentage |
|---------------|--------------------------------------------------------------------------------|-----------|------------|
| d450          | Walking                                                                        | 730       | 23.0%      |
| d410          | Changing basic body position                                                   | 560       | 17.6%      |
| d415          | Maintaining a body position                                                    | 508       | 16.0%      |
| d440          | Fine hand use                                                                  | 319       | 10.0%      |
| d430          | Lifting and carrying objects                                                   | 244       | 7.7%       |
| d475          | Driving                                                                        | 215       | 6.8%       |
| d445          | Hand and arm use                                                               | 163       | 5.1%       |
| d455          | Moving around                                                                  | 147       | 4.6%       |
| Other         | Mobility-related activities for which no specific ICF code could be identified | 123       | 3.9%       |
| d470          | Using transportation                                                           | 103       | 3.2%       |
| d460          | Moving around in different locations                                           | 55        | 1.7%       |
| d435          | Moving objects with lower extremities                                          | 5         | 0.2%       |
| d420          | Transferring oneself                                                           | 4         | 0.2%       |

**Table 4.** ICF code descriptions and frequencies for Self-Care/Domestic Life dataset (4,665 samples total). Codes are ordered by frequency in the dataset. Descriptions given are the preferred name of each code in the ICF.

| Self-care/Domestic Life Code | Description                                                                           | Frequency | Percentage |
|------------------------------|---------------------------------------------------------------------------------------|-----------|------------|
| d570                         | Looking after one's health                                                            | 2,032     | 43.6%      |
| Manage medication            | Ability to manage medication (SNOMED CT code 285033005)                               | 520       | 11.1%      |
| d540                         | Dressing                                                                              | 353       | 7.6%       |
| d520                         | Caring for body parts                                                                 | 312       | 6.7%       |
| d640                         | Doing housework                                                                       | 297       | 6.4%       |
| d630                         | Preparing meals                                                                       | 222       | 4.8%       |
| Other                        | Self-Care/Domestic Life activities for which no specific ICF code could be identified | 174       | 3.7%       |
| Therapy                      | Compliance behavior to therapeutic regimen (SNOMED CT code 709007004)                 | 143       | 3.1%       |
| d620                         | Acquisition of goods and services                                                     | 142       | 3.0%       |
| d510                         | Washing oneself                                                                       | 121       | 2.6%       |
| d550                         | Eating                                                                                | 102       | 2.2%       |
| d560                         | Drinking                                                                              | 82        | 1.8%       |
| d660                         | Assisting others                                                                      | 79        | 1.7%       |
| d650                         | Caring for household objects                                                          | 40        | 0.8%       |
| d530                         | Toileting                                                                             | 29        | 0.6%       |
| d610                         | Acquiring a place to live                                                             | 17        | 0.3%       |

### 3.1.2 Self-Care/Domestic Life dataset

Thirteen distinct three-digit ICF codes (seven from Chapter 5 *Self-Care*, six from Chapter 6 *Domestic Life*) were used in data annotation, together with the added labels of *Manage medication* and *Therapy*

and the “Other” category. Table 4 lists the observed frequency of each of these labels in the dataset. The most frequent code was d570 *Looking after one’s health*, accounting for 43.6% of the samples by itself. Five codes (d530 *Toileting*, d560 *Drinking*, d610 *Acquiring a place to live*, d650 *Caring for household objects*, and d660 *Assisting others*) occurred fewer than 100 times. A total of 175 samples were found that could not be mapped to a single appropriate three-digit ICF code.

## 3.2 Automated ICF coding

### 3.2.1 Development experiments: identifying the best word embeddings

Figure 4 illustrates the results of development set experiments to identify the best word embedding features to use for coding Mobility and Self-Care/Domestic Life mentions. We evaluated MIMIC, NIHCC, SSA, and clinicalBERT embedding features for both classification and candidate selection approaches, with and without the Action oracle.

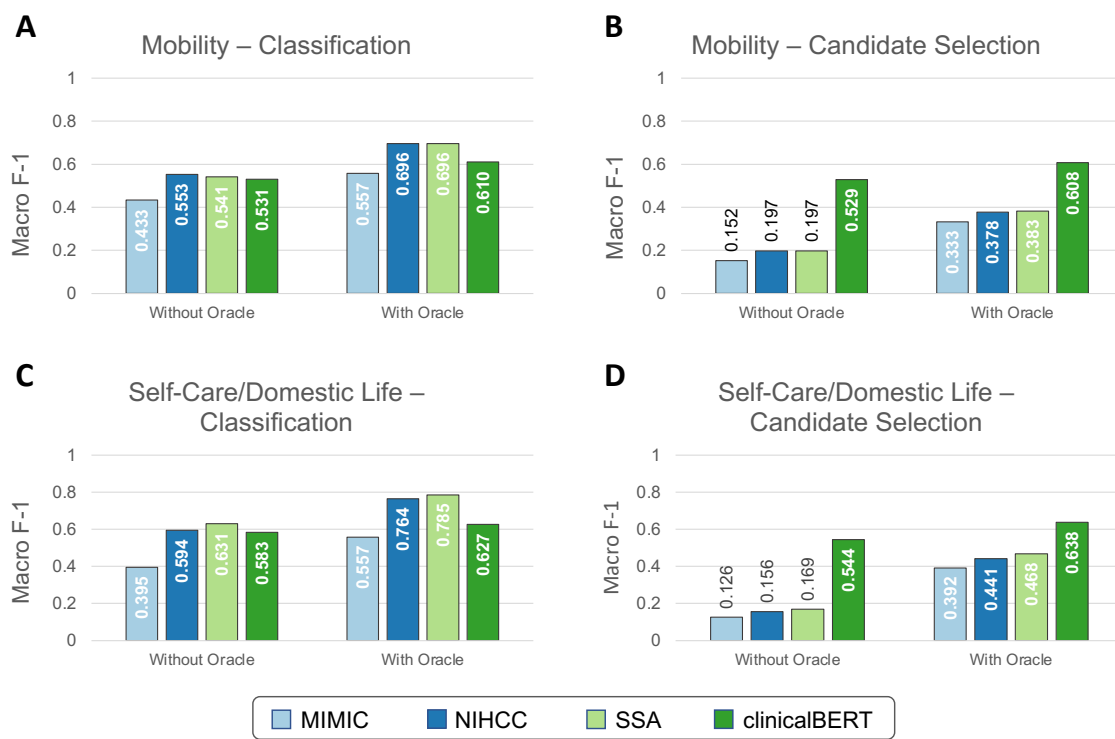

**Figure 4.** Development experiment results for selecting word embeddings. Development set performance (macro-averaged F-1 with ten-fold cross validation) is shown using each embedding strategy for both Mobility and Self-Care/Domestic Life data, using both classification and candidate selection approaches.

For the Mobility dataset, embeddings trained on the NIHCC and SSA corpora achieved highest development set performance both with the Action oracle (F-1=0.696 for both NIHCC and SSA) and without (NIHCC=0.553, SSA=0.541, difference not significant at  $p$ -value=0.9, bootstrap resampling). NIHCC embeddings were statistically significantly better than the next best clinicalBERT features (F-1 of 0.553 vs 0.531;  $p$ -value=0.025) without the Action oracle, while SSA embeddings were not significantly different from clinicalBERT (F-1 of 0.541 vs 0.531;  $p$ -value=0.17). We therefore took NIHCC embeddings as the best-performing features for classification experiments on the Mobility test set.

For the Self-Care/Domestic Life dataset, SSA embeddings achieved highest development set performance both with the Action oracle (SSA F-1=0.785 vs NIHCC F-1=0.764;  $p$ -value=0.031) and without (SSA=0.631, NIHCC=0.594;  $p$ -value=0.015). We therefore took SSA embeddings as the best-performing features for Self-Care/Domestic Life classification experiments.

Under the candidate selection approach, clinicalBERT features significantly ( $p \ll 0.001$ ) outperformed all other embeddings on both datasets. We used clinicalBERT embeddings as the best-performing features for test set candidate selection experiments.

### 3.2.2 Main experiments

Figure 5 shows overall performance of classification and candidate selection experiments on the Mobility and Self-Care/Domestic Life test sets. Classification models consistently outperformed candidate selection ( $p=0.041$  for Mobility without Action oracle;  $p \ll 0.001$  for Mobility with Action oracle and both settings of Self-Care/Domestic Life). This is consistent with our prior findings of comparable or slightly lower performance for our candidate selection model on Mobility data from physical therapy encounters (16). The Action oracle significantly ( $p \ll 0.001$ ) improved performance in all cases, clearly demonstrating the value of building NLP systems to extract the Action components of activity mentions.

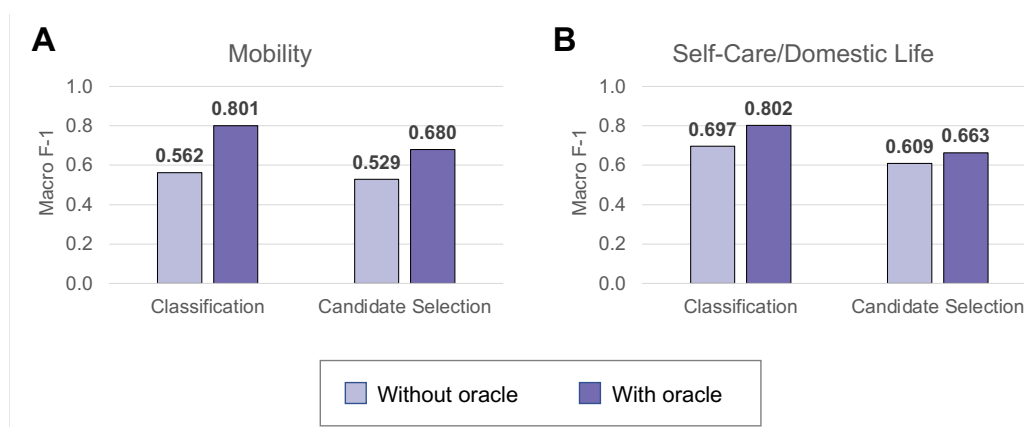

**Figure 5.** Test set performance on automated ICF coding in Mobility (Panel A) and Self-Care/Domestic Life (Panel B) test sets. Performance is reported for the best classification (Mobility: NIHCC embeddings; Self-Care/Domestic Life: SSA embeddings) and candidate selection (both datasets: clinicalBERT embeddings) models.

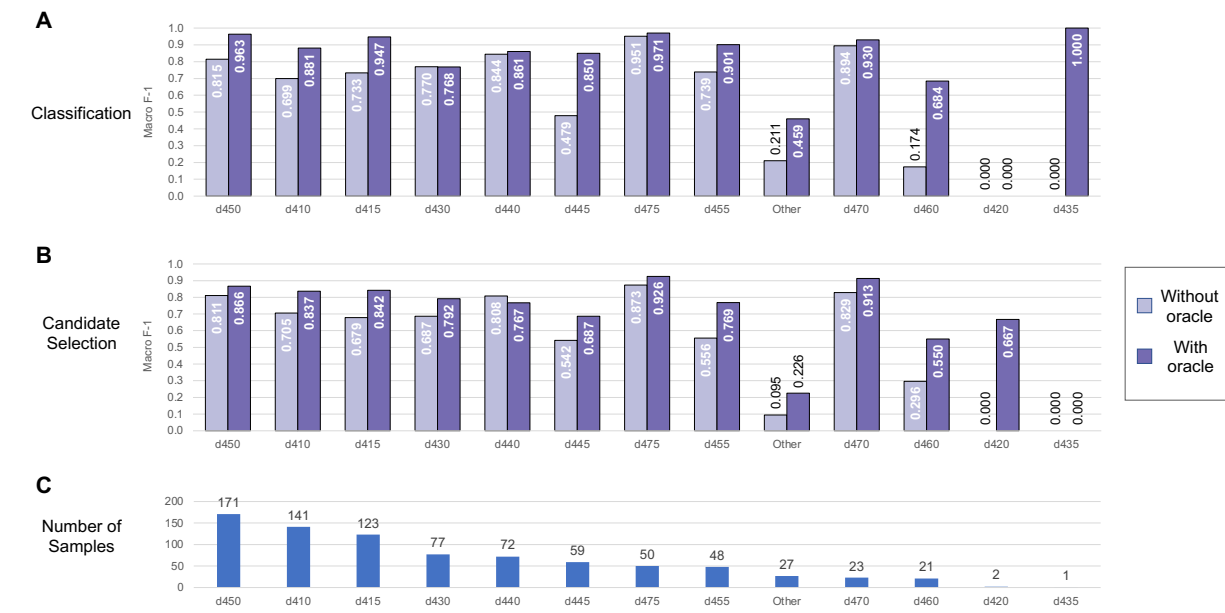

**Figure 6.** Automated coding performance for each distinct code in the Mobility dataset. Classification results are shown in Panel A, and candidate selection results in Panel B. Codes are ordered by descending frequency (illustrated in Panel C).

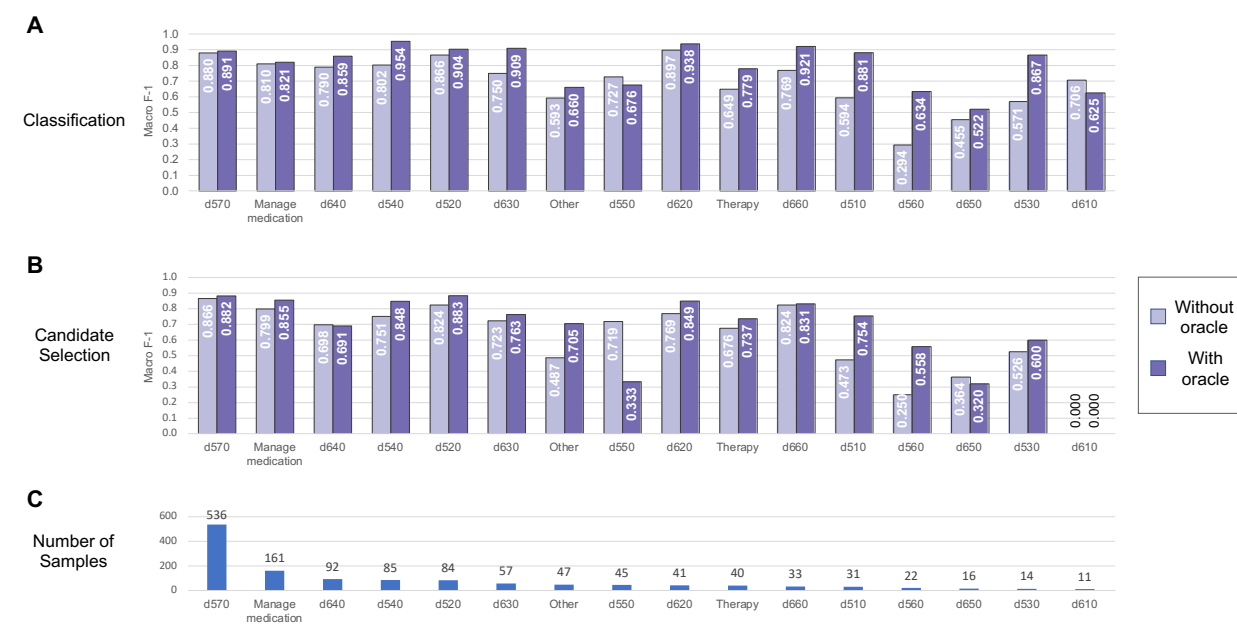

**Figure 7.** Automated coding performance for each distinct code in the Self-Care/Domestic Life dataset. Classification results are shown in Panel A, and candidate selection results in Panel B. Codes are ordered by descending frequency (illustrated in Panel C).

We further analyzed performance on each individual label in the Mobility dataset (shown in Figure 6) and the Self-Care/Domestic Life dataset (shown in Figure 7). Performance generally trended with the frequency of the label—i.e., both classification and candidate selection performance were best for the most frequent codes and gradually degrades for less frequent codes. We did not observe any codes

where our classification or candidate selection models showed a clear advantage; rather, our classification models tended slightly higher than candidate selection on almost all codes. Having access to the location of Action components (i.e., with the Action oracle) improved performance on almost all codes, with most of the largest gains on rare codes: e.g., an F-1 gain of 0.25 (candidate selection) and 0.5 (classification) on d460 (21 samples) in Mobility data, and an F-1 gain of 0.3 (candidate selection) and 0.33 (classification) on d560 (22 samples) in Self-Care/Domestic Life data.

## 4 Discussion

We have shown that rich and diverse information on Mobility, Self-Care, and Domestic Life is recorded in free text health records collected from health providers by SSA for disability benefits adjudication. We presented NLP systems to map this information to specific ICF codes using two paradigms: classification (comparing each sample to other, previously-seen samples) and candidate selection (comparing a sample to ICF codes directly). Our experiments demonstrated that these systems show promising performance for enabling automated analysis of medical evidence through the lens of the ICF.

Our study also revealed limitations of the ICF as a practical tool for analyzing medical documentation. We discuss key insights from our annotation process in the following section, and highlight the particularly complex case of ICF code d570 *Looking after one's health*. We further discuss implications of NLP tools for functional status—aligned to the ICF or to another conceptual framework—in both the SSA use case of disability adjudication and broader applications in clinical care and research.

### 4.1 Practical limitations of the ICF for Mobility, Self-Care, and Domestic Life information

Coding functional status information according to a standardized framework such as the ICF allows us to identify what kinds of functioning are discussed in health records and to organize information on patient functioning for retrieval and analysis. The ICF, as the internationally accepted classification of human functioning, is an important touchstone for this work, and it allowed us to capture a broad set of information about functional activity in free text health records. However, some activity mentions we observed in practice did not align with the codes presented in the ICF, such as “managing stairs”, “doing household tasks”, and “cleaning”. At the same time, other codes had significant overlap with one another in the expert annotation process, such as d450 *Walking*, d455 *Moving around*, and d460 *Moving around in different locations*. Some activity descriptors were highly context-dependent for selecting the appropriate ICF code: for example, we annotated “drinking” as d560 *Drinking* for the generic action of drinking, but as d570 *Looking after one's health* when used to refer specifically to drinking alcohol (e.g., “He drinks two shots of whiskey a day”). Thus, while the ICF is clear and comprehensive for coding many Mobility, Self-Care, and Domestic Life activities, its use is often more theoretical than practical when applied to actual clinical reporting.

#### 4.1.1 ICF code d570 is overly broad

The limitations of the ICF in practice were particularly clear for the Self-Care code d570 *Looking after one's health*. We found this code to be significantly over-represented in our data (accounting for 43.6% of all observed Self-Care/Domestic Life actions), and extremely broad in practice. Code d570 was treated as referring to preventative measures (e.g., exercising, taking prescribed medications, etc.) a person does to, or for, themselves or will/plans to do in the future. We excluded from consideration what a healthcare provider has done or plans to do, the goals providers set for

themselves, or descriptions of specific therapy sessions that are not directly related to Self-Care. With this operational definition, we coded d570 for information as diverse as:

- She exercises 4 to 5 times a week
- Stretching, breathing techniques
- He drinks two shots of whiskey a day
- She has had two suicide attempts in the past
- He smokes a pack of cigarettes a day
- Takes over the counter supplements
- He is compliant with treatment but remains symptomatic
- I haven't gone to counseling but I talk to my friend who is a preacher
- He consumed caffeine 1-2 times a week

Notably, we found code d570 in practice to include several social determinants of health, such as drug and alcohol use (also including misuse and abuse) and smoking status. In addition to the breadth of information, several activity mentions we coded with d570 required some level of inference on the part of the reader to understand the functioning described. For example, we annotated “I talk to my friend who is a preacher” in the example above as d570 because in the context of referring to counseling, this can be understood as the patient establishing a connection and/or reaching for help to look after themselves. References to suicide attempts were also coded as d570 because of the detriment involved to the physical and mental health of the patient.

From a practical standpoint in the annotation process, activity mentions coded with d570 presented two further complications. While stated (or implied) reasons for a patient taking care of themselves or not were not generally included in annotating activity mentions, in some cases they provided context to clarify whether an action was related to taking care of oneself or not. For example, in “her tendency to take a double shift knowing that there will be a detrimental impact on her comfort and health status”, the phrase “take a double shift” alone is not sufficient to determine a code of d570; including its effect on the patient’s health provides the necessary context to clarify that this is related to taking care of oneself. In addition, d570 was the only code where negation needed to be captured as part of the Action component, when it pertained to suicide or other self-harm, recreational drug and/or alcohol use, or medication non-compliance.

In summary, we found that the ICF is not necessarily in line with the types of information providers record about Self-Care, and that code d570 was too broad to effectively capture the diversity of Self-Care activities described in the data.

#### **4.1.2 Distinguishing “Therapy” and “Manage medications” actions from other uses of d570**

We took the step in this study of specifically distinguishing *Therapy* and *Manage medication* as distinct Self-Care categories, separate from the broader d570 code. We found that clinical notes frequently provided detailed information on specific therapeutic interventions and determined that separate categories would provide a more organized view of the patient’s treatment as a whole. We distinguished between medications, which are therapies that a licensed provider needs to approve (in contrast to over-the-counter products such as multivitamins or alternative medicines, which we classified as d570), and non-pharmacological therapies such as addiction treatment programs, physical therapy, occupational therapy, cognitive behavior modification therapy, psychological therapy and/or counseling, and anger management. To provide concrete examples of these



**Table 5.** Examples for the related labels of ICF code d570, Manage Medication, and Therapy. Brief notes are provided for each example as to why it was or was not annotated as shown. Activity mentions are indicated using yellow highlights, and Actions are indicated using underlines.

| Code              | Examples                                                                                                                    | Notes                                                                                                             |
|-------------------|-----------------------------------------------------------------------------------------------------------------------------|-------------------------------------------------------------------------------------------------------------------|
| d570              | Her sleep varies and she never feels rested                                                                                 | Not annotated; these fall within the Body Functions domain of the ICF.                                            |
|                   | <u>She has had a previous suicide attempt</u>                                                                               | Suicidal actions are annotated as indicating risks to health.                                                     |
|                   | <u>He drinks a six-pack of beer a day</u>                                                                                   | Reference to alcohol consumption.                                                                                 |
|                   | <u>Patient was well-nourished</u>                                                                                           | Indicates the person is taking care of themselves.                                                                |
|                   | <u>Her tendency to take a double shift knowing that there will be a detrimental effect on her comfort and health status</u> | Significant context needed to clarify the impact on self-care.                                                    |
| Manage Medication | He is currently prescribed medication by his neurologist to slow down the progression of his symptoms                       | Not annotated; does not state whether the person is actually taking the medications or not.                       |
|                   | <u>Pt is currently on medication</u> : Prazosin at bedtime...                                                               | Medications the patient is currently taking; the medications themselves are not annotated.                        |
|                   | <u>She takes Tylenol</u>                                                                                                    | Reason for medication not needed; the specific medication is annotated to clarify what action is being performed. |
| Therapy           | He has had no psychiatric care and no history of psychiatric hospitalization                                                | Not annotated; reference to therapeutic care the patient has not used.                                            |
|                   | <u>She had occupational therapy</u> for a custom splint                                                                     | Therapy for a particular purpose related to health.                                                               |
|                   | <u>He was seeing a counselor</u> for his drug addiction                                                                     | Counseling for a particular purpose related to health.                                                            |

distinctions, and further illustrate the complex scope of code d570, Table 5 (drawn from our annotation guideline (32)) presents a selection of samples for each label together with notes on why the information was or was not annotated as presented.

#### 4.2 Potential applications in the SSA disability adjudication process

The process of adjudicating applications to the SSA for federal disability benefits was one of the motivating use cases for this study. The adjudication process includes collection and review of highly heterogeneous medical evidence, frequently collected as free text or semi-structured documents, to identify whether a person meets the necessary criteria for determining disability. This is a sequential process, which involves identifying information related to functioning at multiple steps. Claimants may be allowed based on meeting specified medical criteria organized into different body systems (33), where musculoskeletal criteria refer to several aspects of Mobility, criteria for mental disorders

involve multiple areas of daily functioning, and criteria for multiple body systems refer to adherence to treatment. Claimants will also often report on daily activities and routines to provide details on functional abilities and limitations relevant to the workplace. Functional assessment is also a regular part of the adjudication process to determine whether a claimant is able to work, including through Residual Functional Capacity assessments which include physical assessments highly dependent on Mobility. Thus, NLP-based tools to extract information related to functioning and organize it according to a standardized framework such as the ICF could be of use at multiple points in the disability adjudication process (34).

### **4.3 Broader implications of ICF coding with NLP**

Many studies have demonstrated the potential of automated and semi-automated ICD coding systems, using NLP methods, to streamline medical coding processes (35–37). Growing integration of the ICF into clinical and research settings, from primary care (38) and EHR implementation (39) to pediatric research (40), present similar opportunities to smooth the adoption and practical use of ICF codes with NLP-based coding systems. Vreeman and Richoz (41) describe potential benefits to both clinical care and research from integrating the ICF and other standardized vocabularies into EHRs, and Bettger et al. (42) highlight the role of EHR data in providing key insights to advance quality measures, research, and policy for rehabilitation. NLP technologies for ICF coding, such as those presented in this study, can serve as a valuable method to leverage the ICF as a lens to study the rich information collected in EHR notes.

### **4.4 Limitations**

The SSA documents used in this study were a mix of clinical records sourced from healthcare providers around the U.S. and specialty records for consultations commissioned by SSA pertaining to a disability benefits claim. These documents are thus not representative of EHR notes in most health systems. In addition, the population who is the subject of these documents consists of claimants for federal disability benefits due to work-related disability; this population is not necessarily representative of persons receiving rehabilitation care (or other care involving functional assessment) more broadly. From a practical standpoint, many of the SSA documents used exhibited severe noise from the OCR conversion process from scanned images to text. In our experiments, model design hyperparameters were not explored, nor were alternative classification or candidate selection methods, potentially limiting the F-1 measures we were able to achieve.

## **5 Conclusions**

Valuable information about patient functioning is regularly recorded in the free text portions of the EHR. The expressivity of natural language allows for documentation of rich details about functional experience, from levels of functional limitations experienced in different contexts to the patient's goals and priorities for their own functioning. While free text documentation is difficult to analyze with traditional methods, NLP technologies enable powerful, semantically-enriched analysis of functioning information without losing expressivity. We analyzed two datasets of clinical records pertaining to disability benefits claims submitted to the U.S. Social Security Administration, using the ICF to identify and organize documented information about claimants' Mobility, Self-Care, and Domestic Life functioning. We found a rich diversity of functional status information in SSA documents, and developed NLP models to automatically code this information according to the ICF. Our models achieved strong performance across key types of Mobility, Self-Care, and Domestic Life activities, demonstrating promise for automatically organizing functional status information within the ICF framework for easier analysis and review. We identified several practical limitations of the

ICF for coding clinical reports, particularly the overly broad formulation of the Self-Care code d570, Looking after one's health. The results of this study and the NLP technologies assessed have significant implications for deepening the analysis of free text EHR data through an ICF lens, and will contribute to ongoing efforts to learn more from the EHR in rehabilitation.

### **Conflict of Interest**

The authors declare that the research was conducted in the absence of any commercial or financial relationships that could be construed as a potential conflict of interest.

### **Author Contributions**

DNG: conceptualization of study, development of methodology, conducting experiments, data analysis, and lead author of this manuscript. JCM: development of methodology, data collection and annotation, co-author of this manuscript. PSH: development of methodology, data collection and annotation, co-author of this manuscript. MS: development of methodology, data collection and annotation. RJS: development of methodology, data collection and annotation, statistical analysis. JP: project administration, development of methodology, data collection, co-author of this manuscript. LC: acquisition of funding, project administration. All authors contributed to this article and approved the submitted version.

### **Funding**

This research was supported by the Intramural Research Program of the National Institutes of Health and the U.S. Social Security Administration.

### **List of Abbreviations**

EHR: electronic health record

FSI: functional status information

IAA: inter-annotator agreement

ICF: International Classification of Functioning, Disability and Health

NLP: natural language processing

SSA: U.S. Social Security Administration

### **Acknowledgments**

We thank Chunxiao Zhou and Alex Marr for invaluable assistance in data management and calculation of inter-annotator agreement. We also gratefully thank Elizabeth Rasch for invaluable discussions and feedback on this article.

### **Data Availability Statement**

The datasets presented in this article include identified medical information collected by the U.S. Social Security Administration for the purposes of adjudicating claims for disability benefits, and are not able to be shared.

## References

1. World Health Organization. International Classification of Functioning, Disability and Health: ICF. Geneva: World Health Organization (2001). 299 p.
2. Gustavsen M, Mengshoel AM. Clinical physiotherapy documentation in stroke rehabilitation: an ICDH-2 beta-2 based analysis. *Disabil Rehabil* (2003) 25(19):1089–96.
3. Bogardus ST, Towle V, Williams CS, Desai MM, Inouye S. What Does the Medical Record Reveal about Functional Status? *J Gen Intern Med* (2001) 16(11):728–36. doi: 10.1111/j.1525-1497.2001.00625.x
4. Nicosia FM, Spar MJ, Steinman MA, Lee SJ, Brown RT. Making Function Part of the Conversation: Clinician Perspectives on Measuring Functional Status in Primary Care. *J Am Geriatr Soc* (2019) 67(3):493–502. doi: 10.1111/jgs.15677
5. Rosenbloom ST, Denny JC, Xu H, Lorenzi N, Stead WW, Johnson KB. Data from clinical notes: a perspective on the tension between structure and flexible documentation. *J Am Med Inform Assoc* (2011) 18(2):181–6. doi: 10.1136/jamia.2010.007237
6. Newman-Griffis D, Porcino J, Zirikly A, Thieu T, Camacho Maldonado J, Ho P-S, et al. Broadening horizons: The case for capturing function and the role of health informatics in its use. *BMC Public Health* (2019) 19(1):1288. doi: 10.1186/s12889-019-7630-3
7. Kimia AA, Savova G, Landschaft A, Harper MB. An Introduction to Natural Language Processing: How You Can Get More From Those Electronic Notes You Are Generating. *Pediatr Emerg Care* (2015) 31(7):536–41. doi: 10.1097/PEC.0000000000000484
8. Kreimeyer K, Foster M, Pandey A, Arya N, Halford G, Jones SF, et al. Natural language processing systems for capturing and standardizing unstructured clinical information: A systematic review. *J Biomed Inform* (2017) 73:14–29. doi: 10.1016/j.jbi.2017.07.012
9. Kukafka R, Bales ME, Burkhardt A, Friedman C. Human and Automated Coding of Rehabilitation Discharge Summaries According to the International Classification of Functioning, Disability, and Health. *J Am Med Informatics Assoc* (2006) 13(5):508–15. doi: 10.1197/jamia.M2107
10. Agaronnik N, Lindvall C, El-Jawahri A, He W, Iezzoni L. Use of Natural Language Processing to Assess Frequency of Functional Status Documentation for Patients Newly Diagnosed With Colorectal Cancer. *JAMA Oncol* (2020) 6(10):1628–30. doi: 10.1001/jamaoncol.2020.2708
11. Agaronnik ND, Lindvall C, El-Jawahri A, He W, Iezzoni LI. Challenges of Developing a Natural Language Processing Method With Electronic Health Records to Identify Persons With Chronic Mobility Disability. *Arch Phys Med Rehabil* (2020) 101(10):1739–46. doi: 10.1016/j.apmr.2020.04.024
12. Chen T, Dredze M, Weiner JP, Hernandez L, Kimura J, Kharrazi H. Extraction of Geriatric

Syndromes From Electronic Health Record Clinical Notes: Assessment of Statistical Natural Language Processing Methods. *JMIR Med Inf* (2019) 7(1):e13039. doi: 10.2196/13039

13. Newman-Griffis D, Zirikly A. Embedding Transfer for Low-Resource Medical Named Entity Recognition: A Case Study on Patient Mobility. *Proc BioNLP Workshop* (2018) 1–11. doi: 10.18653/v1/W18-2301
14. Newman-Griffis D, Fosler-Lussier E. HARE: a Flexible Highlighting Annotator for Ranking and Exploration. *Proceedings of the 2019 Conference on Empirical Methods in Natural Language Processing and the 9th International Joint Conference on Natural Language Processing (EMNLP-IJCNLP): System Demonstrations* (2019) 85–90. doi: 10.18653/v1/D19-3015
15. Thieu T, Maldonado JC, Ho P-S, Ding M, Marr A, Brandt D, et al. A comprehensive study of mobility functioning information in clinical notes: Entity hierarchy, corpus annotation, and sequence labeling. *Int J Med Inform* (2021) 147:104351. doi: 10.1016/j.ijmedinf.2020.104351
16. Newman-Griffis D, Fosler-Lussier E. Automated Coding of Under-Studied Medical Concept Domains: Linking Physical Activity Reports to the International Classification of Functioning, Disability, and Health. *Front Digit Heal* (2021) 3:620828. doi: 10.3389/fdgth.2021.620828
17. Kohler F, Connolly C, Sakaria A, Stendara K, Buhagiar M, Mojaddidi M. Can the ICF be used as a rehabilitation outcome measure? A study looking at the inter- and intra-rater reliability of ICF categories derived from an ADL assessment tool. *J Rehabil Med* (2013) 45(9):881–7. doi: 10.2340/16501977-1194
18. den Ouden MEM, Schuurmans MJ, Mueller-Schotte S, Brand JS, van der Schouw YT. Domains Contributing to Disability in Activities of Daily Living. *J Am Med Dir Assoc* (2013) 14(1):18–24. doi: 10.1016/j.jamda.2012.08.014
19. Linacre JM, Heinemann AW, Wright BD, Granger C V, Hamilton BB. The structure and stability of the functional independence measure. *Arch Phys Med Rehabil* (1994) 75(2):127–32. doi: 10.1016/0003-9993(94)90384-0
20. Hripcsak G, Rothschild AS. Agreement, the F-Measure, and Reliability in Information Retrieval. *J Am Med Informatics Assoc* (2005) 12(3):296-298. doi: 10.1197/jamia.M1733
21. Grouin C, Rosset S, Zweigenbaum P, Fort K, Galibert O, Quintard L. Proposal for an Extension of Traditional Named Entities: From Guidelines to Evaluation, an Overview. *Proceedings of the 5th Linguistic Annotation Workshop* (2011) 92–100.
22. Turney PD, Pantel P. From Frequency to Meaning: Vector Space Models of Semantics. *J Artif Intell Res* (2010) 37:141–88. doi: 10.1613/jair.2934
23. Bojanowski P, Grave E, Joulin A, Mikolov T. Enriching Word Vectors with Subword Information. *Trans ACL* (2017) 5:135–46. doi: 10.1162/tacl\_a\_00051
24. Devlin J, Chang M-W, Lee K, Toutanova K. BERT: Pre-training of Deep Bidirectional Transformers for Language Understanding. *Proceedings of the 2019 Conference of the North American Chapter of the Association for Computational Linguistics: Human Language*

- Technologies, Volume 1 (Long and Short Papers) (2019) 4171–86. doi: 10.18653/v1/N19-1423
25. Johnson AEW, Pollard TJ, Shen L, Lehman L-WH, Feng M, Ghassemi M, et al. MIMIC-III, a freely accessible critical care database. *Sci Data* (2016) 3:160035. doi: 10.1038/sdata.2016.35
  26. Honnibal M, Montani I. spaCy 2: Natural language understanding with Bloom embeddings, convolutional neural networks and incremental parsing. To Appear.
  27. Alsentzer E, Murphy J, Boag W, Weng W-H, Jindi D, Naumann T, et al. Publicly Available Clinical BERT Embeddings. *Proceedings of the 2nd Clinical Natural Language Processing Workshop* (2019) 72–78. doi: 10.18653/v1/W19-1909
  28. Noble WS. What is a support vector machine? *Nat Biotechnol* (2006) 24(12):1565–7. doi: 10.1038/nbt1206-1565
  29. Berg-Kirkpatrick T, Burkett D, Klein D. An Empirical Investigation of Statistical Significance in NLP. *Proceedings of the 2012 Joint Conference on Empirical Methods in Natural Language Processing and Computational Natural Language Learning* (2012) 995–1005.
  30. Dror R, Baumer G, Shlomov S, Reichart R. The Hitchhiker’s Guide to Testing Statistical Significance in Natural Language Processing. *Proceedings of the 56th Annual Meeting of the Association for Computational Linguistics (Volume 1: Long Papers)* (2018) 1383–92. doi: 10.18653/v1/P18-1128
  31. Soberg HL, Sandvik L, Ostensjo S. Reliability and applicability of the ICF in coding problems, resources and goals of persons with multiple injuries. *Disabil Rehabil* (2008) 30(2):98–106. doi: 10.1080/09638280701216862
  32. Epidemiology & Biostatistics Section, Rehabilitation Medicine Department, NIH Clinical Center. *Formulating Functional Terminology from the International Classification of Functioning, Disability and Health: Annotation Guideline for Self-Care and Domestic Life Domains. Unpublished Guideline* (2020).
  33. US Social Security Administration. *Disability Evaluation Under Social Security. 64-039.* (2008). <https://www.ssa.gov/disability/professionals/bluebook/general-info.htm> [Accessed July 15, 2021]
  34. Desmet B, Porcino J, Zirikly A, Newman-Griffis D, Divita G, Rasch E. Development of Natural Language Processing Tools to Support Determination of Federal Disability Benefits in the U.S. *Proceedings of the 1st Workshop on Language Technologies for Government and Public Administration (LT4Gov)* (2020) 1–6.
  35. Imai T, Kajino M, Sato M, Ohe K. Development of structured ICD-10 and its application to computer-assisted ICD coding. *Stud Health Technol Inform* (2010) 160(2):1080–4. doi: 10.3233/978-1-60750-588-4-1080
  36. Harteloh P. The implementation of an automated coding system for cause-of-death statistics. *Inform Health Soc Care* (2020) 45(1):1–14. doi: 10.1080/17538157.2018.1496092

37. Zhou L, Cheng C, Ou D, Huang H. Construction of a semi-automatic ICD-10 coding system. *BMC Med Inform Decis Mak* (2020) 20(1):67. doi: 10.1186/s12911-020-1085-4
38. Postma SAE, van Boven K, Ten Napel H, Gerritsen DL, Assendelft WJJ, Schers H, et al. The development of an ICF-based questionnaire for patients with chronic conditions in primary care. *J Clin Epidemiol* (2018) 103:92–100. doi: 10.1016/j.jclinepi.2018.07.005
39. Maritz R, Aronsky D, Proding B. The International Classification of Functioning, Disability and Health (ICF) in Electronic Health Records: A Systematic Literature Review. *Appl Clin Inform* (2017) 8:964–80. doi: 10.4338/ACI2017050078
40. Schiariti V, Longo E, Shoshmin A, Kozhushko L, Besstrashnova Y, Król M, et al. Implementation of the International Classification of Functioning, Disability, and Health (ICF) Core Sets for Children and Youth with Cerebral Palsy: Global Initiatives Promoting Optimal Functioning. *Int J Environ Res Public Health* (2018) 15(9):1899. doi: 10.3390/ijerph15091899
41. Vreeman DJ, Richoz C. Possibilities and implications of using the ICF and other vocabulary standards in electronic health records. *Physiother Res Int* (2015) 20(4):210–9. doi: 10.1002/pri.1559
42. Bettger JP, Nguyen VQC, Thomas JG, Guerrier T, Yang Q, Hirsch MA, et al. Turning Data Into Information: Opportunities to Advance Rehabilitation Quality, Research, and Policy. *Arch Phys Med Rehabil* (2018) 99(6):1226–31. doi: 10.1016/j.apmr.2017.12.029
